# Supplementary material
Source: PubMed Central journal article supplement (PMC4936590)
Supplement: supp_pp.16.00664_PP2016-00664R1_Supplemental_Materialtbl.pdf [file supp_pp.16.00664_PP2016-00664R1_Supplemental_Materialtbl.pdf]

# Supplemental Table S1. List of Primer sequences used for this study.

| <b>Promoter and Gene Construction</b> |                             |                                             |
|---------------------------------------|-----------------------------|---------------------------------------------|
| Full length cDNA                      | MED15-CFT                   | CACCatggataataacaattggagccttctt             |
|                                       | MED15-CR                    | ggaagctgctacatatttccaagtgcgta               |
|                                       | MED14-CFT                   | CACCatggcggaattaggcaacagagc                 |
|                                       | MED14-CR                    | ggtgtaataataacaacactcaaaaaggaattacc         |
|                                       | WR11-CFT                    | CACCatgaagaagcgttaaccaactccaact             |
| WR11-CR2                              | gaccaatagttacaagaaccgaggttg |                                             |
| MED15 deletion construction           | MED15-CtermFT               | CACCatgggtgtagttcagtcctagcaattggca          |
|                                       | MED15-N1R                   | atfgggattgggaacattccctgactg                 |
|                                       | MED15-N2R                   | tgcaacattgcttggagtcgcaagtg                  |
| Promoter isolation                    | MED15-PF1-attB1             | aa aaa gca ggc gtcttctcttgcgaaacttaa        |
|                                       | MED15-PR2-attB2             | a gaa agc tgg gtcaatttctgtgttacaagcca       |
|                                       | WR11-PFT                    | CACCctctgaaacgaatataatgatactaggaaaa         |
|                                       | WR11-PR1                    | aaggaggaagggttaattgggttaattaacac            |
| RNAi construction                     | MED15-PF-EcoRI              | aacGAATTCgttttctcttgcgaaactaaactatg         |
|                                       | MED15-PR2-Xho               | aacCTCGAGcaagtttctgtgttacaagccatga          |
|                                       | MED15-RiF-Xho               | aacCTCGAGatcaaatctatgaagagacttactaccag      |
|                                       | MED15-RiR-Nco               | attCCATGGagatgatagaacattctctgcatattg        |
|                                       | MED15-RiR-Bm                | attGGATCCagatgatagaacattctctgcatattg        |
|                                       | MED15-RiF-Xba               | aagTCTAGAAatcaaatctatgaagagacttactaccagatcg |
| Recombinant protein construction      | WR11-F-Bm                   | aatGGATCCatgaagaagcgttaaccaactcc            |
|                                       | WR11-DR-Xh                  | aacCTCGAGctcttgatggttagcttgggtccac          |
|                                       | WR11-DF-Bm                  | aatGGATCCatgggtattctgttgaagccaaa            |
|                                       | WR11-CR2-Xh                 | aatCTCGAGcacaatagttacaagaaccga              |
|                                       | GL2-F-Bm                    | aatGGATCCatgaattcaacggtttctgacgac           |
|                                       | GL2-R-Xh                    | aatCTCGAGggtctatcacaatgaagagcagcttt         |
|                                       | MED15-DF2-Bm                | aatGGATCCatgatacaacagcagctgcag              |
|                                       | MED15-DR3-Xho               | aatCTCGAGcattcgtccaacattgtttt               |
|                                       | <b>qRT-PCR primer</b>       |                                             |
| At3g54320 ( <i>WR11</i> )             | WR11-QF                     | tacctcgccacctataatcagcagga                  |
|                                       | WR11-QR                     | ctcttgatggttagcttgcacag                     |
| At1g15780 ( <i>MED15</i> )            | MED15-QF                    | atgatggcgactaagaanaatgaagc                  |
|                                       | MED15-QR                    | ctcagttctgcttctgcccac                       |
| At2g37620 ( <i>ACT1N1</i> )           | ACT1-QF                     | ctctgtctgattggaggttc                        |
|                                       | ACT1-QR                     | gcttgagaatgctcgaaa                          |
| At5g15530 ( <i>BCCP2</i> )            | BCCP2-QF                    | ggatctcttctcctcctgattgtt                    |
|                                       | BCCP2-QR                    | ataaattcagagaactccgcccgt                    |
| At3g22960 ( <i>Ch-PKα</i> )           | Ch-PK-QF                    | tggcatcactgcttcccgatg                       |
|                                       | Ch-PK-QR                    | tcataaccttgaattcagtaacagaa                  |
| At5g52920 ( <i>Cy-PKβ</i> )           | Cy-PK-QF                    | agtcactatgctctccggcaca                      |
|                                       | Cy-PK-QR                    | cgcctctgacgattgatttctct                     |
| At5g49190 ( <i>SUS2</i> )             | SUS2-QF                     | tcaagtcagttcaactcagatcfaat                  |
|                                       | SUS2-QR                     | caactcggtaagaccagcatatgtaa                  |
| At5g46290 ( <i>KAS1</i> )             | KAS1-QF                     | tcgcaaaacacacatcacacac                      |
|                                       | KAS1-QR                     | gtgattgacgattgaggttaag                      |
| At1g62640 ( <i>KAS3</i> )             | KAS3-QF                     | tggcttctctgcttctgcc                         |
|                                       | KAS3-QR                     | ccgcttctcactgcctcat                         |
| At4g25140 ( <i>OLE1</i> )             | OLE1-QF                     | tgccctataaccgttttctcttggga                  |
|                                       | OLE1-QR                     | atgtcccccaccagatgttgccttccc                 |
| At3g12120 ( <i>FAD2</i> )             | FAD2-QF                     | cctcagcctctctctacttgctt                     |
|                                       | FAD2-QR                     | ccaggagaaatgaaggacagag                      |
| At2g29980 ( <i>FAD3</i> )             | FAD3-QF                     | ctactgttggctcataatgttctgca                  |
|                                       | FAD3-QR                     | cgtagataactccatctctgctt                     |
| At4g34520 ( <i>FAE1</i> )             | FAE1-QF                     | gtcttaaccaattttcaacctctgtt                  |
|                                       | FAE1-QR                     | ccaaaccgaaaaacagtgaagcaaaaggt               |
| At3g05020 ( <i>ACP1</i> )             | ACP1-QF                     | aatctatcttcaacctcgcctgt                     |
|                                       | ACP1-QR                     | agagaatctgctccaaggtcagca                    |
| <b>ChIP-qPCR primer</b>               |                             |                                             |
| At3g54320 ( <i>WR11</i> )             | WR11-PF                     | cagcgtggagagtaagctattgg                     |
|                                       | WR11-PR                     | ggagctgtagctgattgatttctcag                  |
| At5g15530 ( <i>BCCP2</i> )            | BCCP2-PF                    | gaacatggcagctgattgaactgatag                 |
|                                       | BCCP2-PR                    | acagtgacagatgaaccgaggg                      |
| At5g52920 ( <i>Cy-PKβ</i> )           | Cy-PK-PF                    | agtcagagtttaaacgcgctgtt                     |
|                                       | Cy-PK-PR                    | aaagctgagacagatgtagaagga                    |
| At5g49190 ( <i>SUS2</i> )             | SUS2-PF                     | aactgatccattttggcgggtctt                    |
|                                       | SUS2-PR                     | aacctggcggagatttctcaactg                    |
| At5g46290 ( <i>KAS1</i> )             | KAS1-PF                     | ctacaaggctagaactaaacacttg                   |
|                                       | KAS1-PR                     | gagagagagagagagcagataa                      |
| At1g62640 ( <i>KAS3</i> )             | KAS3-PF                     | tcctcaaatcgagctgacact                       |
|                                       | KAS3-PR                     | caacgaatcgaaggtctctatg                      |
| At3g12120 ( <i>FAD2</i> )             | FAD2-PF                     | gtgcaatcccttcaaac                           |
|                                       | FAD2-PR                     | ccaaaagcaaaagaatcaacaagc                    |
| At5g09810 ( <i>ACTIN7</i> )           | ACT7-PF                     | ggatttctctgcttctgctgct                      |
|                                       | ACT7-PR                     | actcaaacatgcttcatatgttga                    |
